# Supplementary material for: Photoluminescence and scintillation characteristics of Bi-loaded PVK-based plastic scintillators for the high counting-rate measurement of high-energy X-rays
Source: Royal Society of Chemistry journal article supplement (doi:10.1039/d1ra01878g), 2021-01-01
Supplement: d1ra01878g1.pdf [file d1ra01878g1.pdf]

Electronic Supplementary Information

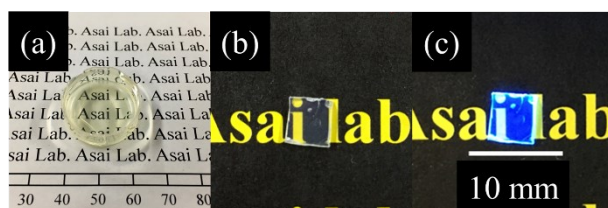

Fig. S1 Photograph of (a) synthesized 0.90-mm-thick, Bi-loaded PVK-based plastic scintillator, and the sample used for measurement under (b) visible light and (c) 302-nm UV radiation.

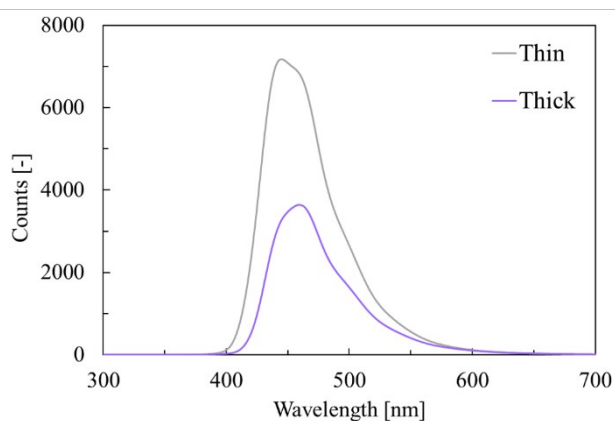

Fig. S2 XRL spectra of ~1-mm-thick and thin samples.

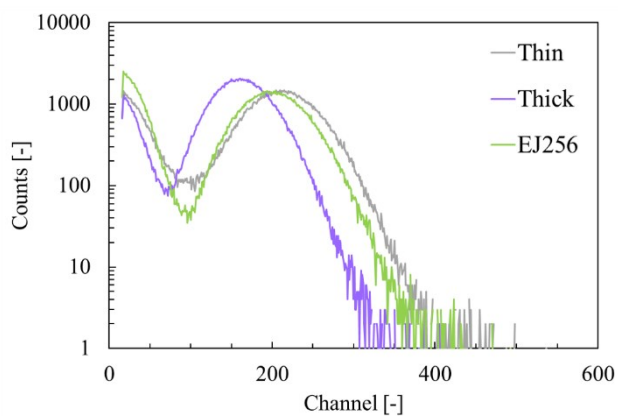

Fig. S3 Pulse-height spectra of scintillation detectors equipped with a ~1-mm-thick sample, thin sample, and EJ-256 under 67.41-keV X-radiation.

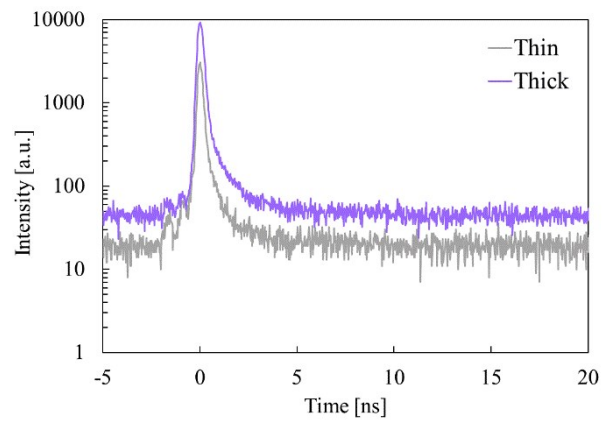

Fig. S4 Time profiles of detection signals of scintillation detectors equipped with a ~1-mm-thick sample, thin sample, and EJ-256 under 67.41-keV X-radiation.
